# Supplementary material for: Matrix metalloproteinase 14 is required for fibrous tissue expansion
Source: eLife. 2015 Sep 21;4:e09345. doi: 10.7554/eLife.09345 (PMC4684142; doi:10.7554/eLife.09345)
Supplement: Supplementary file 1. — LC-MS/MS peptide identity and counts. Editable Microscoft Excel sheet. Peptide identity was ≥99%. Color codes show runs performed from tendons isolated at the same time. Data for fibronectin and periostin are highlighted in yellow. DOI: http://dx.doi.org/10.7554/eLife.09345.024 [file elife09345s001.xlsx]

## Sheet: Sheet1
Protein Common Name	Accession Number	WT #1	WT #2	MMP14 KO #1	MMP14 KO #2	WT #3	Col r/r	WT #4	MMP14 cond. KO
Collagen alpha 1(XII)	Q60847	41	55	40	47	54	31	78	95
Fibrillin 1	Q61554	31	8	46	11	18	7	5	31
Fibrillin 1	A2AQ53	29	8	42	11	18	7	5	31
Myosin 4	Q5SX39	27	5	10	11	7	23	189	111
Collagen alpha-2(I)	Q01149	23	26	12	14	13	16	95	80
Tenascin X	O54796	21	0	13	0	n/d	n/d	34	0
Vimentin	Q3U6S1	20	20	30	30	26	17	27	36
Decorin	P28654	19	21	10	11	16	16	19	17
Collagen alpha 1(I)	P11087	18	24	12	14	15	11	106	90
Tenascin	Q80YX1	13	0	20	0	15	3	7	11
PCPE	Q61398	12	0	1	0	4	0	3	2
Periostin	Q62009	9	13	18	28	9	2	0	47
Myosin 9	Q8VDD5	8	9	25	30	3	2	3	41
Thrombospondin 4	Q9Z1T2	8	7	11	7	10	4	14	14
Nidogen 1	P10493	8	2	3	8	1	3	5	4
Fibromodulin	P50608	7	9	6	8	10	8	10	12
Alpha filamin	Q8BTM8	7	2	22	26	1	6	2	22
Mimecan	Q62000	6	9	3	2	7	8	6	9
Gelsolin	P13020	6	2	2	7	0	0	10	10
COMP	A1A557	6	7	0	1	6	4	6	2
Collagen alpha 1 (XV)	O35206	6	6	1	7	6	0	6	4
Lumican	P51885	4	0	1	8	5	5	4	11
Fibronectin	Q3UGY5	3	7	30	30	14	2	9	57
Vinculin	Q64727	2	0	5	3	5	7	4	23
Fibulin 2	P37889	2	0	0	4	0	0	0	7
Matrillin 2	Q99K64	2	7	2	0	0	0	0	5
Macrophage mannose receptor 1	Q61830	1	0	8	3	1	0	0	5
Fibrillin 2	P37889	1	0	8	4	0	0	0	0
Talin 1	P26039	0	4	0	12	2	7	0	0
Col6a3	E9PWQ3	0	0	0	0	86	68	70	89
Transgelin	P37804	0	0	2	0	0	11	0	6
Collagen alpha-1 (III)	P08121	0	0	0	0	0	0	0	0
Integrin beta 1	P09055	0	0	3	4	3	1	0	2
Integrin alpha V	G5E8F8	0	0	0	2	0	0	0	1
Thrombospondin 1	P35441	0	0	0	0	6	3	3	4
Integrin-linked protein kinase	O55222	0	0	0	3	0	0	0	4
Integrin beta 2	P11835	0	0	0	1	0	0	0	2
Integrin alpha 11	P61622	0	0	3	3	0	0	0	0
Integrin alpha 5	X2C5I8	0	0	0	3	0	0	0	0
